# Supplementary material for: A novel antisense long noncoding RNA within the IGF1R gene locus is imprinted in hematopoietic malignancies
Source: PubMed Central journal article supplement (PMC4150754; doi:10.1093/nar/gku549), 2014-08-04
Supplement: supp_gku549_nar-01050-y-2014-File004.pdf [file supp_gku549_nar-01050-y-2014-File004.pdf]

Crosslinked chromatin complex

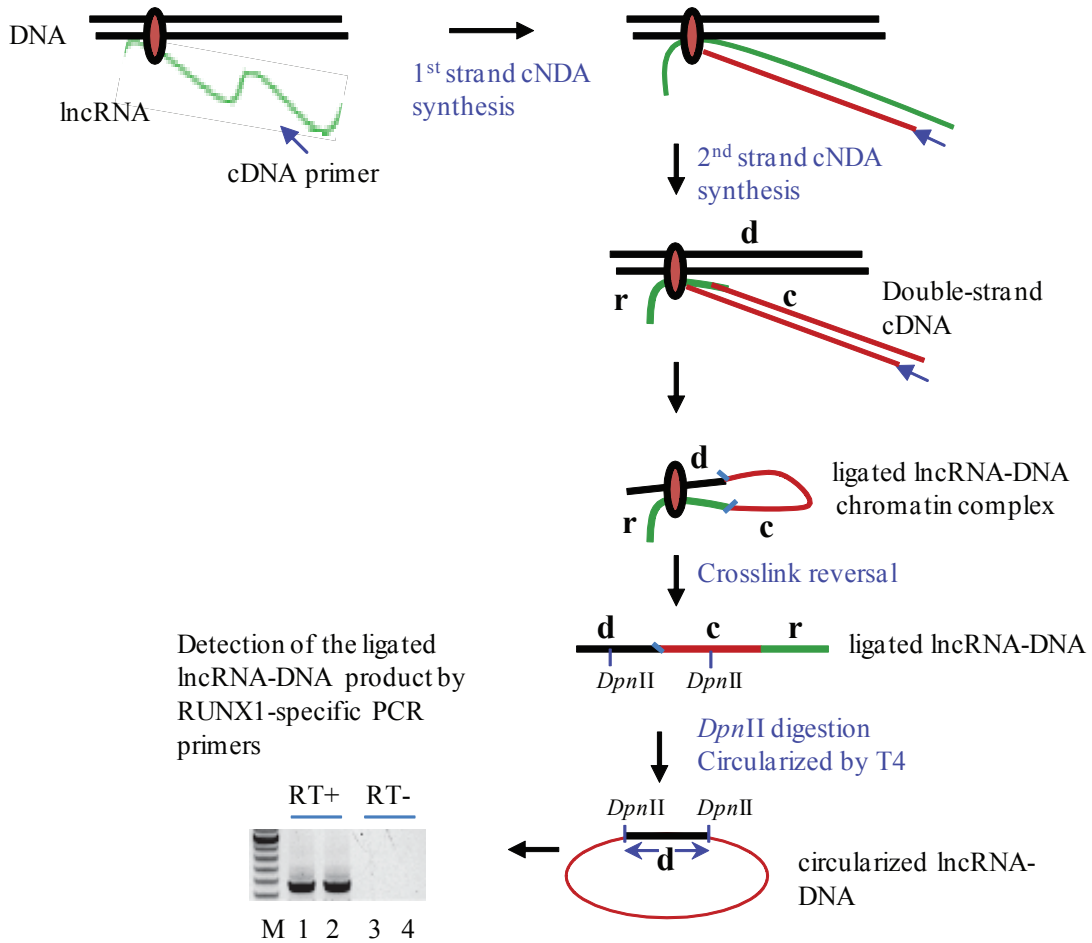

Figure S1. A modified R3C method to detect the chromatin DNA-interacted RNAs



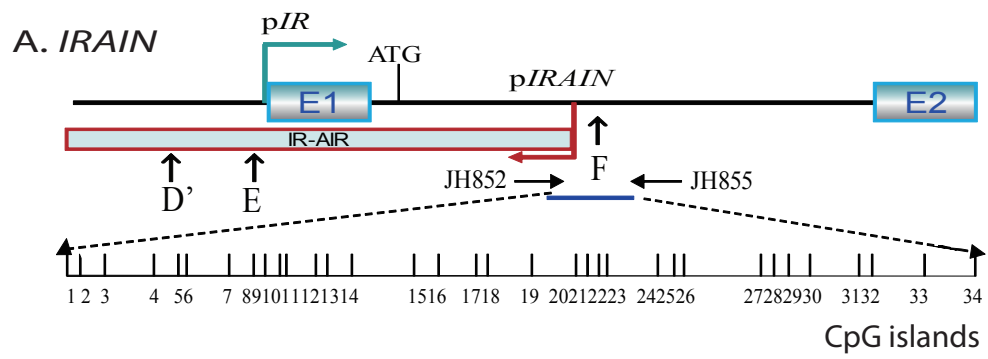

B. K562 DNA methylation

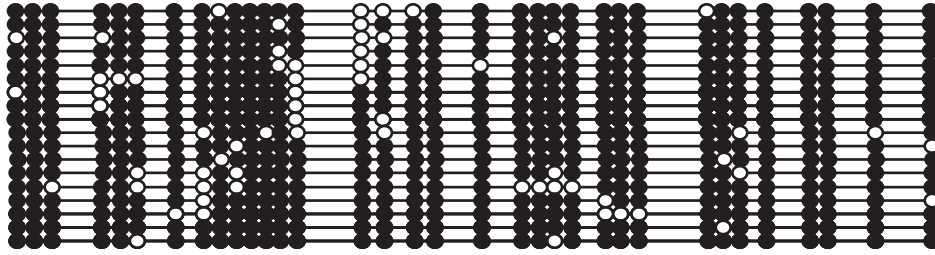

Figure S3. Fully methylated *IRAIN* promoter in K562 cells

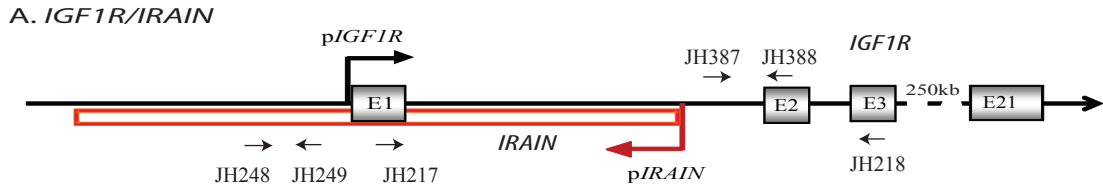

**B. IGF1R/IRAIN preRNAs and RNAs**

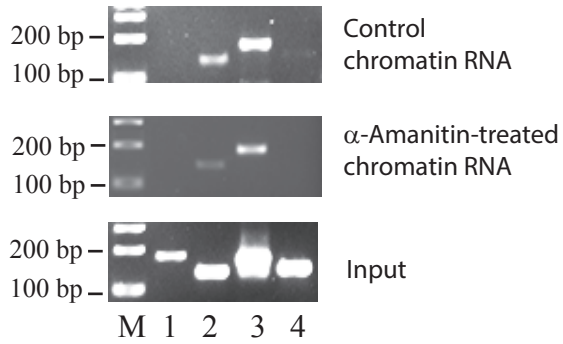

Figure S4. Chromatin-bound RNA in *α*-amanitin treated Kg-1 cells

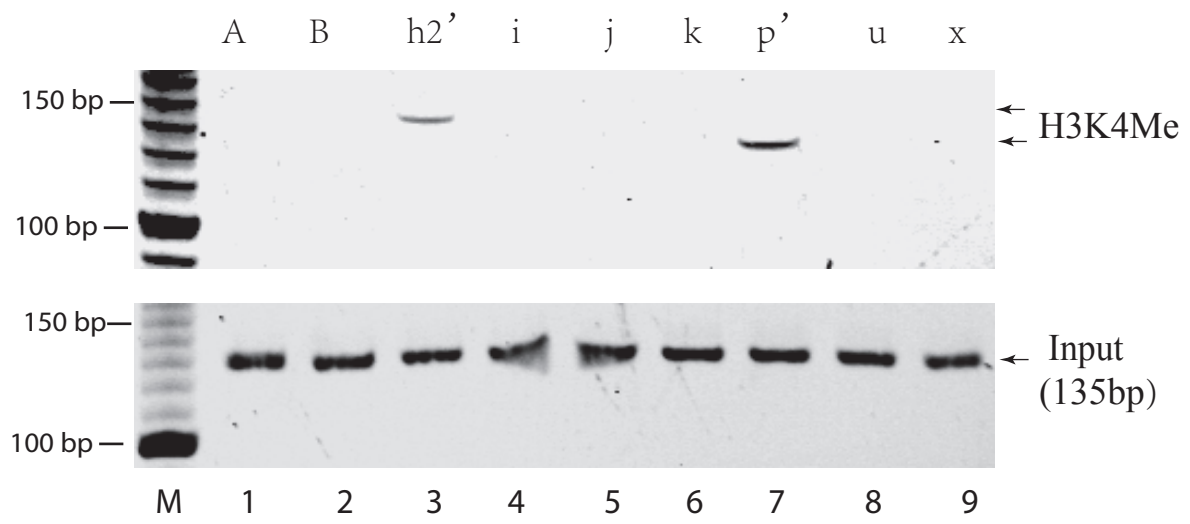

Fig.S5 Active chromatin marker H3K4Me in the *IGF1R* promoter and the enhancer

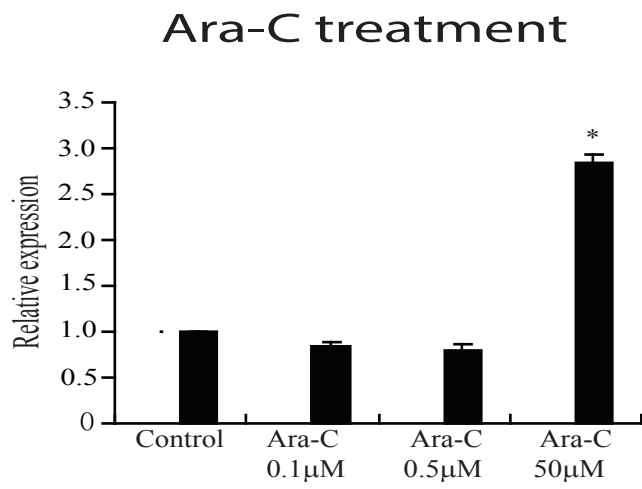

Figure S6. Upregulation of *IRAIN* lncRNA by Ara-C

### A. IRAIN overexpression

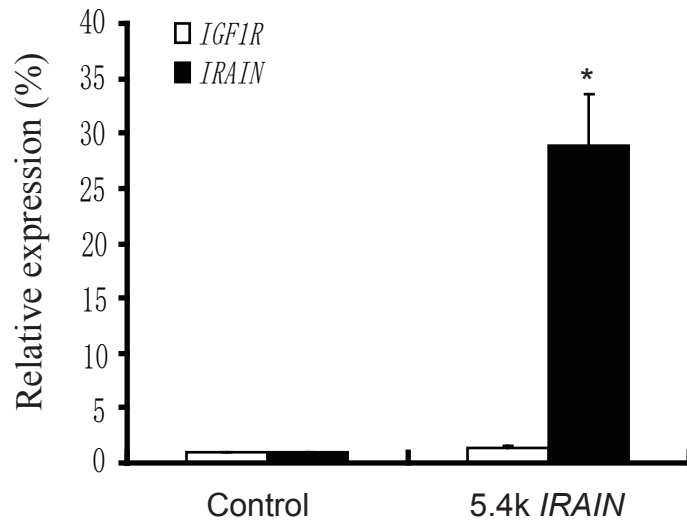

### B. IRAIN knockdown

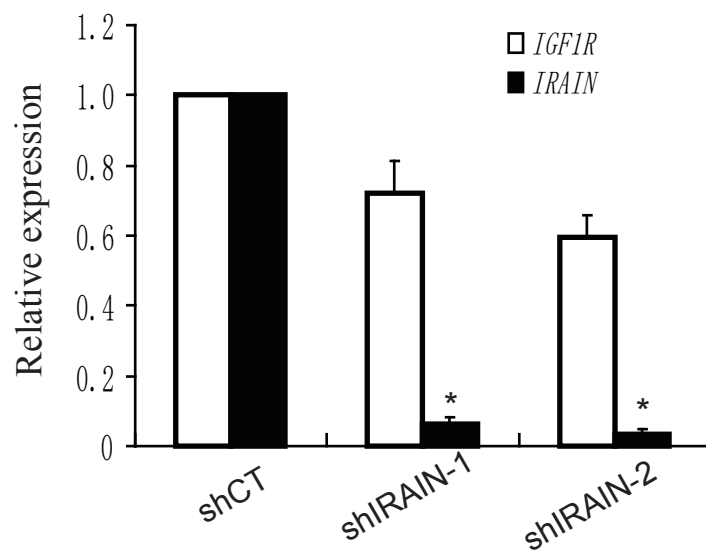

Figure S7. *IGF1R* expression in IRAIN overexpressed and knocked-down cells

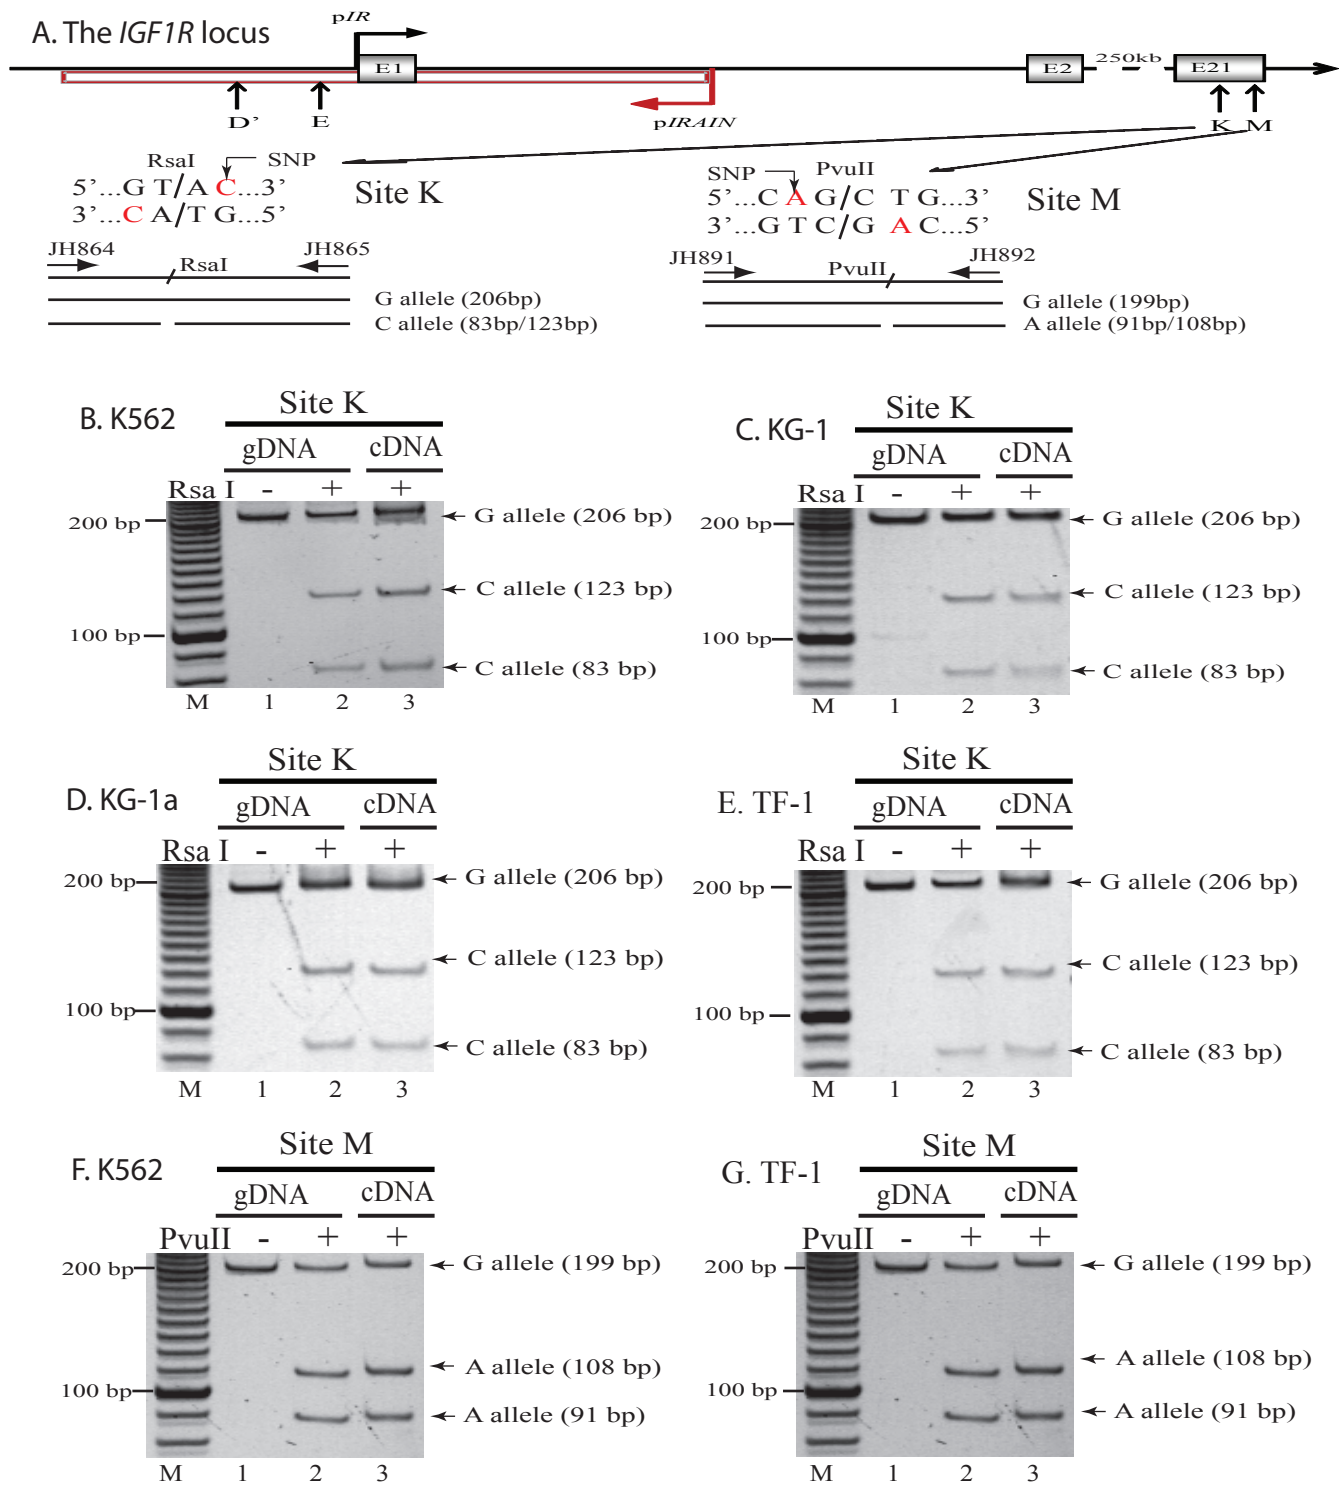

Figure S8. Biallelic expression of the *IGF1R* sense coding RNA



A. The *IRAIN/IGF1R* imprinting locus

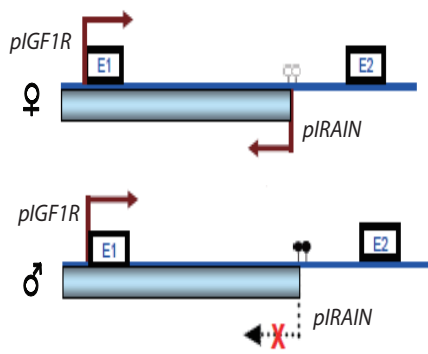

B. The *Igf2r/Airn* imprinting locus

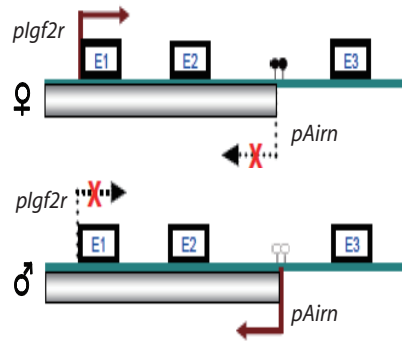

Figure S9. Allelic expression of the human *IRAIN/IGF1R* locus and the mouse *Igf1r/Airn* locus
